# Supplementary material
Source: PubMed Central journal article supplement (PMC9512977)
Supplement: 11095_2022_3400_MOESM1_ESM.pdf [file 11095_2022_3400_MOESM1_ESM.pdf]

**A**nanobody-MFG-E8-hIFN- $\beta$  amino acid sequence

← MFG-E8 signal sequence → | FLAG peptide | ← anti-spike nanobody  
 MPRPRLLAALCGALLCAPSLLVADYKDDDDKDVQLQESGGGLVQPGGSLRLSCAASGLTLDYYAIGWFRQAPGKEREGVS  
 CISSSDGSTYYADSVKGRFTTSRDNAKNTVYLQMNSLKPEDTAVYYCAAVPSTYYSGTYYTCHPGGMDYWGKGTQVTVS  
 | linker | ← human MFG-E8(D48E)  
 SGGGGSLDICSKNPCHNGGLCEEISQEVGEVFPSTYCTCLKGYAGNHCETKCVPEPLGLENGNIANSQIAASSVRVTFGL  
 LQHWVPELARLN RAGMVNAWTPSSNDDNPWIQVNLRRMWTGVVTQGASRLASHEYLKAFKVAYSLNGHEFDIHDVNK  
 KHKEFVGNWKNNAVHVNLFETPVEAQYVRLYPTSCHTACTLRFELLGCELNGCANPLGLKNNSIPDKQITASSSYKTWGL  
 HLFSWNPSYARLDKQGNFNAWVAGSYGNDQWLQVDLGSKEVTGIITQGARNFGSVQFVASYKVAYSNDSANWTEYQDPR  
 TGSSKIFPGNWDNHSKKNLFETPILARYVRILPVAWHNRALRLELLGC GGGGMSYNYLLGFLQRSSNFQCQKLLWQLN  
 GRLEYCLKDRMNFDIPEEIKLQKQFKEDAALTIYEMLNIFAIRQDSSSTGWNETIVENLLANVYHQINHLKTVLEEK  
 LEKEDFTRGKLMSSLHLKRYGRILHYLKAKEYSHCAWTIVRVEILRNIFYINRLTGYLRN

**B**nanobody-MFG-E8-mIFN- $\beta$  amino acid sequence

← MFG-E8 signal sequence → | FLAG peptide | ← anti-spike nanobody  
 MPRPRLLAALCGALLCAPSLLVADYKDDDDKDVQLQESGGGLVQPGGSLRLSCAASGLTLDYYAIGWFRQAPGKEREGVS  
 CISSSDGSTYYADSVKGRFTTSRDNAKNTVYLQMNSLKPEDTAVYYCAAVPSTYYSGTYYTCHPGGMDYWGKGTQVTVS  
 | linker | ← human MFG-E8(D48E)  
 SGGGGSLDICSKNPCHNGGLCEEISQEVGEVFPSTYCTCLKGYAGNHCETKCVPEPLGLENGNIANSQIAASSVRVTFGL  
 LQHWVPELARLN RAGMVNAWTPSSNDDNPWIQVNLRRMWTGVVTQGASRLASHEYLKAFKVAYSLNGHEFDIHDVNK  
 KHKEFVGNWKNNAVHVNLFETPVEAQYVRLYPTSCHTACTLRFELLGCELNGCANPLGLKNNSIPDKQITASSSYKTWGL  
 HLFSWNPSYARLDKQGNFNAWVAGSYGNDQWLQVDLGSKEVTGIITQGARNFGSVQFVASYKVAYSNDSANWTEYQDPR  
 TGSSKIFPGNWDNHSKKNLFETPILARYVRILPVAWHNRALRLELLGC GGGGMSYNYLLGFLQRSSNFQCQKLLWQLN  
 TYRADFKIPMEMTEKMQSYTAFIQEMLQNVFLVFRNFSSTGWNETIVRLLDELHQQTVFLKTVLEEKQEERLTWEMSST  
 ALHLKSYWVRVQRYLKLKMKYNSYAWMVVRAEIFRNFLIIRLTRNFQN

**C**nanobody-hIFN- $\beta$  amino acid sequence

← MFG-E8 signal sequence → | FLAG peptide | ← anti-spike nanobody  
 MPRPRLLAALCGALLCAPSLLVADYKDDDDKDVQLQESGGGLVQPGGSLRLSCAASGLTLDYYAIGWFRQAPGKEREGVS  
 CISSSDGSTYYADSVKGRFTTSRDNAKNTVYLQMNSLKPEDTAVYYCAAVPSTYYSGTYYTCHPGGMDYWGKGTQVTVS  
 | linker | ← human IFN- $\beta$   
 SGGGMSYNYLLGFLQRSSNFQCQKLLWQLN GRLEYCLKDRMNFDIPEEIKLQKQFKEDAALTIYEMLNIFAIRQDSSS  
 TGWNETIVENLLANVYHQINHLKTVLEEKLEKEDFTRGKLMSSLHLKRYGRILHYLKAKEYSHCAWTIVRVEILRNIFYINRLT  
 GYLRN

**D**nanobody-mIFN- $\beta$  amino acid sequence

← MFG-E8 signal sequence → | FLAG peptide | ← anti-spike nanobody  
 MPRPRLLAALCGALLCAPSLLVADYKDDDDKDVQLQESGGGLVQPGGSLRLSCAASGLTLDYYAIGWFRQAPGKEREGVS  
 CISSSDGSTYYADSVKGRFTTSRDNAKNTVYLQMNSLKPEDTAVYYCAAVPSTYYSGTYYTCHPGGMDYWGKGTQVTVS  
 | linker | ← mouse IFN- $\beta$   
 SGGGMSYNYLLGFLQRSSNFQCQKLLWQLN TYRADFKIPMEMTEKMQSYTAFIQEMLQNVFLVFRNFSSTGWN  
 ETIVRLLDELHQQTVFLKTVLEEKQEERLTWEMSSTALHLKSYWVRVQRYLKLKMKYNSYAWMVVRAEIFRNFLIIRLTRNF  
 QN

**Supplemental Figure1. Amino acid sequences of the nanobody-MFG-E8-IFN- $\beta$  and the soluble nanobody-IFN- $\beta$  recombinant proteins**

(A) The amino acid sequence of anti-spike nanobody-MFG-E8-hIFN- $\beta$ . (B) The amino acid sequence of anti-spike nanobody-MFG-E8-mIFN- $\beta$ . (C) The amino acid sequence of soluble anti-spike nanobody-hIFN- $\beta$  recombinant protein. (D) The amino acid sequence of soluble anti-spike nanobody-mIFN- $\beta$  recombinant protein.

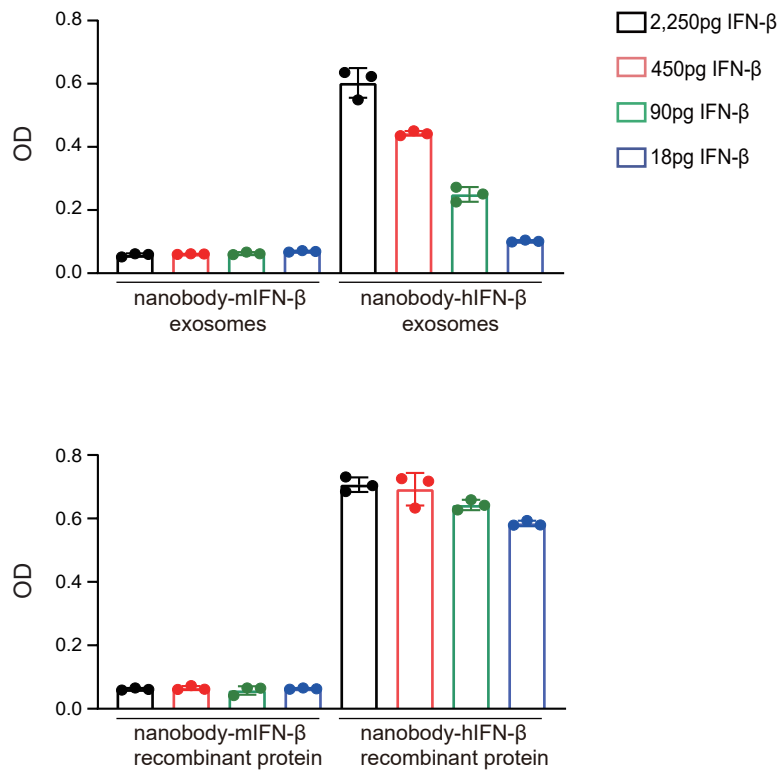

**Supplemental Figure2. Bioactivity of the engineered exosomes and the soluble nanobody-IFN-β recombinant proteins**

The serial dilutions of the engineered exosomes or soluble nanobody-IFN-β recombinant proteins were applied to the HEK-blue IFNα/β cells. After 24 h, the IFN-induced secreted embryonic alkaline phosphatase (SEAP) level was determined using a spectrophotometer at 650 nm.

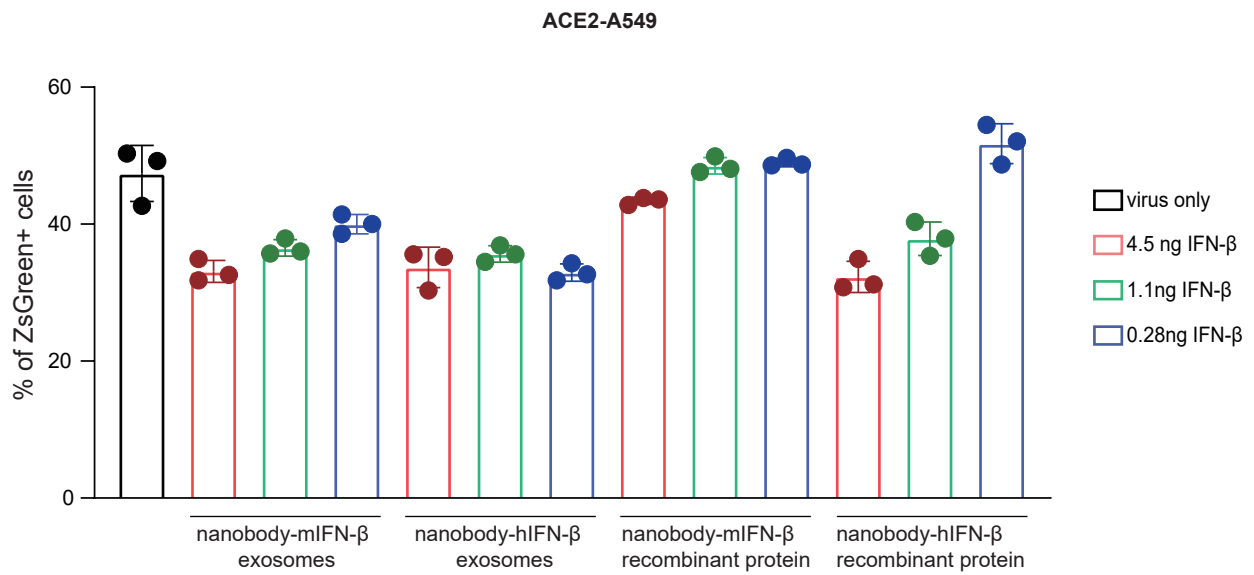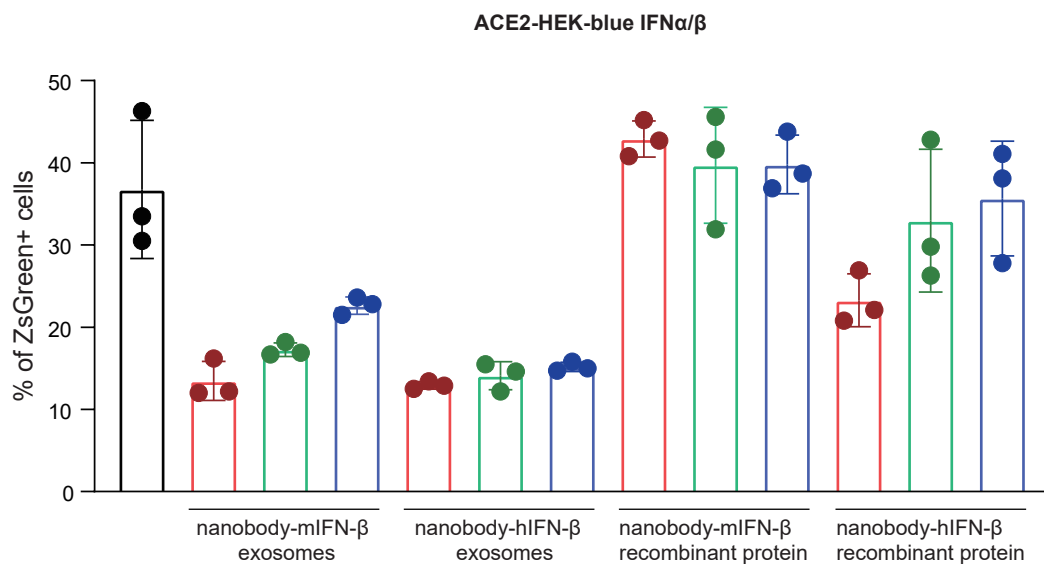

**Supplemental Figure3. Anti-viral efficiency of the engineered exosomes**

The anti-viral effect of high dose (containing 4.5ng IFN- $\beta$ ), middle dose (containing 1.1ng IFN- $\beta$ ), and low dose (containing 0.28ng IFN- $\beta$ ) of nanobody-IFN- $\beta$  conjugated exosomes or soluble nanobody-IFN- $\beta$  recombinant proteins were applied in the infection assay. The percentage of ZsGreen positive cells was analyzed by flow cytometry.
